# Supplementary material
Source: Springer Nature journal article supplement (https://www.springermedizin.de/resource/supplementary/13058_2013_3369_MOESM16_ESM.pdf/9703970)

**A**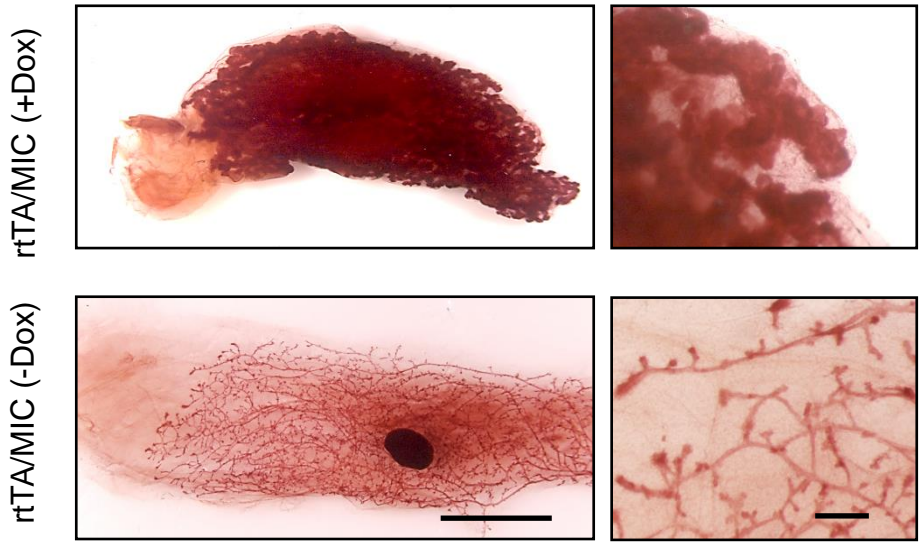**B**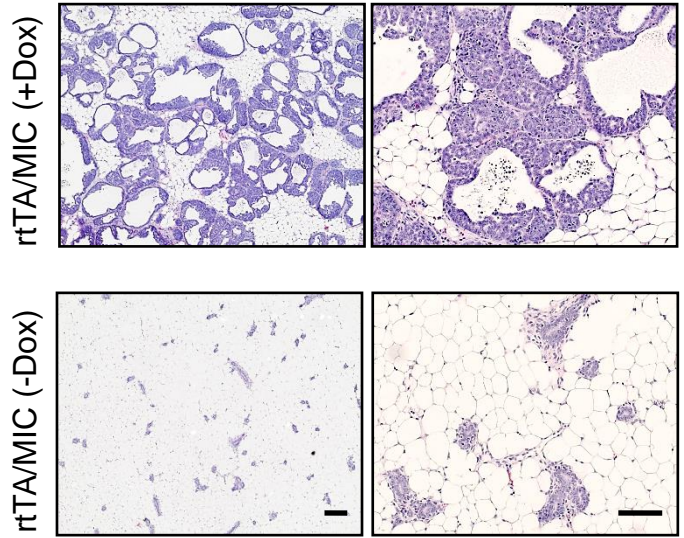**C**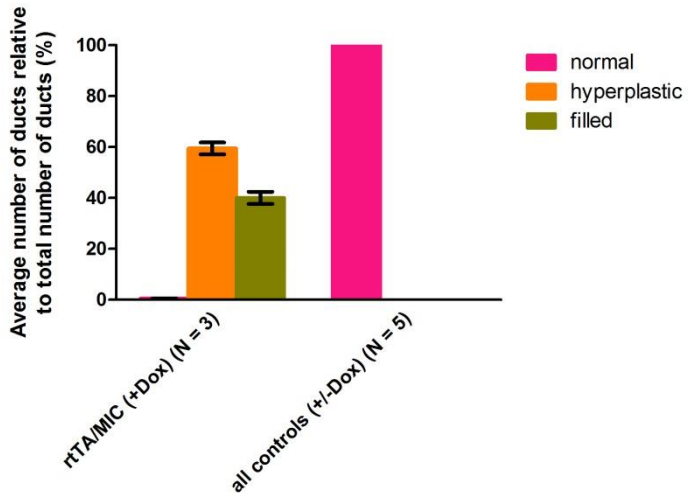

Supplement: MOESM16 [file 9703970]
